# Supplementary material
Source: PubMed Central journal article supplement (PMC8078884)
Supplement: mmc1.pdf [file mmc1.pdf]

# THE LANCET

## Haematology

### Supplementary appendix

This appendix formed part of the original submission and has been peer reviewed.  
We post it as supplied by the authors.

Supplement to: Leentjens J, van Haaps TF, Wessels PF, Schutgens REG, Middeldorp S.  
COVID-19-associated coagulopathy and antithrombotic agents—lessons after  
1 year. *Lancet Haematol* 2021; published online April 27. [https://doi.org/10.1016/S2352-3026\(21\)00105-8](https://doi.org/10.1016/S2352-3026(21)00105-8).

**Supplementary Table 1. Overview of anticoagulant intervention trials in COVID-19 categorized on disease stage, adapted from.**<sup>1</sup> DOAC: Direct Oral Anticoagulant; DTI: Direct Thrombin Inhibitors; ICU: Intensive Care Unit; X indicates that studies are still ongoing.

| Ambulant Patients (Stage 1)      |              |             |                |                              |               |            |                |     |   |
|----------------------------------|--------------|-------------|----------------|------------------------------|---------------|------------|----------------|-----|---|
| <b>HEPARIN Prophylactic dose</b> | <b>Study</b> | <b>N</b>    | <b>results</b> | <b>DOAC Therapeutic dose</b> | <b>Study</b>  | <b>N</b>   | <b>results</b> |     |   |
|                                  | ETHIC        | 1370        | X              |                              | Apixaban      | ACTIV-4b   | 7000           | X   |   |
|                                  | OVID         | 1000        | X              |                              | Edoxaban      | CONVINCE   | 420            | X   |   |
| <b>HEPARIN Intermediate dose</b> |              |             |                |                              | HERO-19       | 172        | X              |     |   |
|                                  |              |             |                | Rivaroxaban                  | COVID-PREVENT | 400        | X              |     |   |
|                                  |              |             |                |                              |               |            |                |     |   |
| <b>DOAC Prophylactic dose</b>    |              |             |                | <b>OTHER</b>                 |               |            |                |     |   |
|                                  | Apixaban     | ACTIV-4b    | 3000           |                              | X             | Sulodexide | SulES-COVID    | 243 | 2 |
|                                  | Rivaroxaban  | PREVENT-HD  | 4000           |                              | X             |            |                |     |   |
|                                  |              | NCT 4504032 | 600            |                              | X             |            |                |     |   |
|                                  |              | NCT 4673214 | 62             |                              | X             |            |                |     |   |

**Hospitalized non-ICU patients (Stage 2)**

| <b>HEPARIN</b>                   | <b>Study</b>        | <b>N</b> | <b>results</b> | <b>DOAC</b>                  | <b>Study</b> | <b>N</b>      | <b>results</b> |   |
|----------------------------------|---------------------|----------|----------------|------------------------------|--------------|---------------|----------------|---|
| <b>Prophylactic dose</b>         |                     |          |                | <b>Prophylactic dose</b>     |              |               |                |   |
|                                  |                     |          |                |                              |              |               |                |   |
| <b>HEPARIN Intermediate dose</b> | COVID-19-HD         | 300      | X              | <b>DOAC Therapeutic dose</b> | Rivaroxaban  | ACOVACT       | 500            | X |
|                                  | EMOS-COVID          | 300      | X              |                              | XACT         | 150           | X              |   |
|                                  | X-COVID-19          | 2712     | X              |                              |              |               |                |   |
|                                  | EUCTR 2020-00189-14 | 140      | X              |                              | Apixaban     | FREEDOM COVID | 3600           | X |
|                                  | NCT 41360824        | 170      | X              |                              | Rivaroxaban  | ACTION        | 600            | X |
| <b>HEPARIN Therapeutic dose</b>  | ACTION              | 600      | X              | XACT                         | 150          | X             |                |   |
|                                  | ACTIVE-4a           | 520      | <sup>3</sup>   |                              |              |               |                |   |
|                                  | ATTACC              | 1036     | <sup>3</sup>   |                              |              |               |                |   |
|                                  | BEMICOP             | 164      | X              |                              |              |               |                |   |
|                                  | BEMI COVID-19       | 120      | X              |                              |              |               |                |   |
|                                  | FREEDOM COVID       | 3600     | X              |                              |              |               |                |   |
|                                  | RAPID COVID         | 462      | X              |                              |              |               |                |   |
|                                  | COAG                |          |                |                              |              |               |                |   |
|                                  | REMAP-CAP           | 216      | <sup>3</sup>   |                              |              |               |                |   |
|                                  | NCT 4485429         | 268      | X              |                              |              |               |                |   |
|                                  | NCT 4508439         | 130      | X              |                              |              |               |                |   |

| <b>ICU patients<br/>(Stage 3)</b>        |              |          |                |
|------------------------------------------|--------------|----------|----------------|
| <b>HEPARIN</b>                           | <b>Study</b> | <b>N</b> | <b>results</b> |
| <b>Prophylactic<br/>dose</b>             |              |          |                |
| <b>HEPARIN<br/>Intermediate<br/>dose</b> | CoV-Hep      | 90       | X              |
|                                          | IMPROVE      | 100      | X              |
|                                          | INSPIRATION  | 600      | X              |
|                                          | REMAP-CAP    | Planned  | X              |
| <b>HEPARIN<br/>Therapeutic<br/>dose</b>  | ACTIV-4a     | 129      | 4              |
|                                          | ATTAC        | 35       | 4              |
|                                          | COVID-PACT   | 750      | X              |
|                                          | HESA-COVID   | 20       | X              |
|                                          | TACOVID      | 15       | X              |
|                                          | REMAP CAP    | 959      | 4              |
| <b>DTI<br/>Bivalirudin</b>               | ANTI-CO      | 100      | X              |

| <b>non-ICU + ICU patients<br/>(Stage 2+3)</b> |                     |          |                |
|-----------------------------------------------|---------------------|----------|----------------|
| <b>HEPARIN</b>                                | <b>Study</b>        | <b>N</b> | <b>results</b> |
| <b>Prophylactic<br/>dose</b>                  |                     |          |                |
| <b>HEPARIN<br/>Intermediate<br/>dose</b>      | COVI-DOSE           | 602      | X              |
|                                               | DAWn-Antico         | 210      | X              |
| <b>HEPARIN<br/>Therapeutic<br/>dose</b>       | CORRIMMUNO-<br>COAG | 808      | X              |
|                                               | COVID-HEP           | 200      | X              |
|                                               | HEP-COVID           | 308      | X              |
|                                               | HEPMAB              | 308      | X              |
|                                               | HERO-19             | 172      | X              |
|                                               | IMPACT              | 186      | X              |
|                                               | NCT 4377997         | 300      | X              |
|                                               | NCT 4584580         | 50       | X              |
| <b>DTI<br/>Argatroban</b>                     | IMPACT              | 186      | X              |

---

**Post-discharge**

---

**DOAC****Prophylactic**

| <b>dose</b> | <b>Study</b> | <b>N</b> | <b>results</b> |
|-------------|--------------|----------|----------------|
| Apixaban    | ACTIV-4c     | 5320     | X              |
| Rivaroxaban | MICHELLE     | 320      | X              |

**References**

1. Talasaz AH, Sadeghipour P, Kakavand H, et al. Antithrombotic therapy in COVID-19: systematic summary of ongoing or completed randomized trials. *medRxiv* 2021; published online Jan 6. <https://doi.org/10.1101/2021.01.04.21249227> (preprint).
2. Gonzalez Ochoa AJ, Raffetto J, Hernandez Ibarra AG, et al. Sulodexide in the treatment of patients with early stages of COVID-19: a randomized controlled trial. *Thromb Haemost* 2021; published online March 7. <https://doi.org/10.1055/a-1414-5216>.
3. ATTACC, ACTIV-4a and REMAP-CAP. Results of Interim Analysis. Jan 28, 2021. [https://static1.squarespace.com/static/5cde3c7d9a69340001d79ffe/t/6013892709de942b53f6e3da/1611893037749/mpRCT+interim+presentation\\_v21-slides+22+and+23+corrected.pdf](https://static1.squarespace.com/static/5cde3c7d9a69340001d79ffe/t/6013892709de942b53f6e3da/1611893037749/mpRCT+interim+presentation_v21-slides+22+and+23+corrected.pdf) (accessed March 26, 2021).
4. The REMAP-CAP, ACTIV-4a, ATTACC Investigators, Zarychanski R. Therapeutic anticoagulation in critically ill patients with COVID-19 – preliminary report. *medRxiv* 2021; published online March 12. <https://doi.org/10.1101/2021.03.10.21252749> (preprint).
